# Supplementary material for: The social readjustment rating scale: Updated and modernised
Source: PubMed Central journal article supplement (PMC10727443; doi:10.1371/journal.pone.0295943), 2023-12-18
Supplement: pone.0295943.s002.pdf [file pone.0295943.s002.pdf]

## S1 Appendix 1

### Social Readjustment Rating Questionnaire

#### The Social Readjustment Rating Scale

1. Social readjustment includes the amount and duration of change in one's accustomed pattern of life resulting from various life events. Social readjustment measures the intensity and length of time necessary for you to adapt, *regardless of the desirability of this event*.

2. *Use all of your own experience*, as well as what you have learned to be the case for others, in judging the amount of adjustment required. You need not have experienced something yourself to have an opinion about the amount of adjustment it would take.

3. Suppose that marriage takes 50 units of adjustment. Compare each of the events below to marriage and think to yourself, "Would this event require more or less adjustment than marriage?", "Would the readjustment take longer or shorter to accomplish?" If you decide the readjustment is more intense and protracted, enter a *proportionately larger* number than 50 for the event. If you decide the event represents less and shorter readjustment than marriage then indicate how much less by providing a *proportionately smaller* number next to the event. If it is equal to marriage, enter the number 50 next to the event.

**Kindly use the above criteria to provide your chosen value for each of the events below relative to marriage, which is defined as 50.**

**Use any number between 0 - 100.**

## S1 Appendix 1

|    | <b>Life Event</b>                                                                                                                                                    | <b>Rating</b> |
|----|----------------------------------------------------------------------------------------------------------------------------------------------------------------------|---------------|
| 1  | Troubles with the boss                                                                                                                                               | _____         |
| 2  | Detention in jail or other institution                                                                                                                               | _____         |
| 3  | Death of a spouse or life partner                                                                                                                                    | _____         |
| 4  | Major change in sleeping habits (a lot more or a lot less, or change in part of day when asleep)                                                                     | _____         |
| 5  | Death of a close family member                                                                                                                                       | _____         |
| 6  | Major change in eating habits (a lot more or a lot less food intake, or very different meal hours or surroundings)                                                   | _____         |
| 7  | Foreclosure/repossession on mortgage or loan                                                                                                                         | _____         |
| 8  | Revision of personal habits (dress, manners, associations, etc.)                                                                                                     | _____         |
| 9  | Death of a close friend                                                                                                                                              | _____         |
| 10 | Minor violations of the law (e.g. traffic ticket, disturbing the peace)                                                                                              | _____         |
| 11 | Outstanding personal achievement                                                                                                                                     | _____         |
| 12 | Pregnancy (either yourself or being the father)                                                                                                                      | _____         |
| 13 | Major change in the health or behaviour of a family member                                                                                                           | _____         |
| 14 | Sexual difficulties                                                                                                                                                  | _____         |
| 15 | In-law troubles                                                                                                                                                      | _____         |
| 16 | Major change in number of family get-togethers (e.g. a lot more or a lot less than usual)                                                                            | _____         |
| 17 | Major change in financial state (e.g. a lot worse off or a lot better off than usual)                                                                                | _____         |
| 18 | Gaining a new family member (e.g. through birth, adoption, grandparent moving in, etc.)                                                                              | _____         |
| 19 | Change in residence                                                                                                                                                  | _____         |
| 20 | Son or daughter leaving home (e.g. marriage, attending college, etc.)                                                                                                | _____         |
| 21 | Marital separation                                                                                                                                                   | _____         |
| 22 | Major change in religious activities (e.g. a lot more or a lot less than usual)                                                                                      | _____         |
| 23 | Marital reconciliation                                                                                                                                               | _____         |
| 24 | Losing your job (redundancy, dismissal, etc.)                                                                                                                        | _____         |
| 25 | Divorce                                                                                                                                                              | _____         |
| 26 | Changing to a different line of work                                                                                                                                 | _____         |
| 27 | Major change in the number of arguments with spouse or life partner (e.g. either a lot more or a lot less than usual regarding child-rearing, personal habits, etc.) | _____         |
| 28 | Major change in responsibilities at work (e.g. promotion, demotion, lateral transfer)                                                                                | _____         |
| 29 | Spouse or life partner begins or stops working                                                                                                                       | _____         |
| 30 | Major change in work hours or conditions                                                                                                                             | _____         |
| 31 | Major change in usual type and/or amount of recreation                                                                                                               | _____         |
| 32 | Taking on a mortgage or loan for a major purchase (e.g. purchasing a home, business, etc.)                                                                           | _____         |
| 33 | Taking on a loan for a lesser purchase (e.g. purchasing a car or furniture, paying for college fees, etc.)                                                           | _____         |
| 34 | Major personal injury or illness                                                                                                                                     | _____         |

## S1 Appendix 1

|    | <b>Life Event (cont'd.)</b>                                                                                       | <b>Rating</b> |
|----|-------------------------------------------------------------------------------------------------------------------|---------------|
| 35 | Major business readjustment (e.g. merger, reorganization, bankruptcy, etc.)                                       | _____         |
| 36 | Major change in social activities (e.g. clubs, dancing, movies, visiting, etc.)                                   | _____         |
| 37 | Major change in living conditions (e.g. building a new home, remodelling, deteriorating of home or neighbourhood) | _____         |
| 38 | Retirement from work                                                                                              | _____         |
| 39 | Vacation                                                                                                          | _____         |
| 40 | Christmas                                                                                                         | _____         |
| 41 | Changing to a new school                                                                                          | _____         |
| 42 | Beginning or ceasing formal schooling                                                                             | _____         |
| 43 | Single person, living alone                                                                                       | _____         |

### REFERENCE:

Holmes, T. H., & David, E. M. (Eds.). (1989). *Life change, life events, and illness: selected papers*: Praeger Publishers.

### SRRS item wording changes.

| <b>Original item wording</b>                                                         | <b>New item wording</b>                                                                 |
|--------------------------------------------------------------------------------------|-----------------------------------------------------------------------------------------|
| Death of spouse                                                                      | Death of a spouse or life partner                                                       |
| Minor violations of the law (e.g. traffic ticket, jay walking, disturbing the peace) | Minor violations of the law (e.g. traffic ticket, disturbing the peace)                 |
| Pregnancy                                                                            | Pregnancy (either yourself or being the father)                                         |
| Gaining a new family member (e.g. through birth, adoption, oldster moving in, etc.)  | Gaining a new family member (e.g. through birth, adoption, grandparent moving in, etc.) |
| Marital separation from mate                                                         | Marital separation                                                                      |
| Major change in church activities (e.g. a lot more or a lot less than usual)         | Major change in religious activities (e.g. a lot more or a lot less than usual)         |
| Marital reconciliation with mate                                                     | Marital reconciliation                                                                  |
| Being fired from work                                                                | Losing your job (redundancy, dismissal, etc.)                                           |

## S1 Appendix 1

Cont'd.

| <b>Original item wording</b>                                                                                                                         | <b>New item wording</b>                                                                                                                                              |
|------------------------------------------------------------------------------------------------------------------------------------------------------|----------------------------------------------------------------------------------------------------------------------------------------------------------------------|
| Major change in the number of arguments with spouse (e.g. either a lot more or a lot less than usual regarding child-rearing, personal habits, etc.) | Major change in the number of arguments with spouse or life partner (e.g. either a lot more or a lot less than usual regarding child-rearing, personal habits, etc.) |
| Spouse begins or stops working outside the home                                                                                                      | Spouse or life partner begins or stops working                                                                                                                       |
| Taking on a mortgage greater than \$10,000 (e.g. purchasing a home, business, etc.)                                                                  | Taking on a mortgage or loan for a major purchase (e.g. purchasing a home, business, etc.)                                                                           |
| Taking on a mortgage or loan less than \$10,000 (e.g. purchasing a car or furniture, paying for college fees, etc.)                                  | Taking on a loan for a lesser purchase (e.g. purchasing a car or furniture, paying for college fees, etc.)                                                           |
