# Supplementary material for: The social readjustment rating scale: Updated and modernised
Source: PubMed Central journal article supplement (PMC10727443; doi:10.1371/journal.pone.0295943), 2023-12-18
Supplement: pone.0295943.s004.pdf [file pone.0295943.s004.pdf]

### S3 Appendix 3

#### Updated SRRS and table showing changes to items

### Social Readjustment Rating Scale 2022

| Life Event                                                                                                                                              | Yes                   | No                    |
|---------------------------------------------------------------------------------------------------------------------------------------------------------|-----------------------|-----------------------|
| Marriage                                                                                                                                                | <input type="radio"/> | <input type="radio"/> |
| Losing your job (e.g. redundancy, dismissal, etc.)                                                                                                      | <input type="radio"/> | <input type="radio"/> |
| Change in religious activities (e.g. a lot more or a lot less than usual)                                                                               | <input type="radio"/> | <input type="radio"/> |
| Revision of personal habits (e.g. dress, manners, associations)                                                                                         | <input type="radio"/> | <input type="radio"/> |
| Sexual difficulties                                                                                                                                     | <input type="radio"/> | <input type="radio"/> |
| Trouble with in-laws                                                                                                                                    | <input type="radio"/> | <input type="radio"/> |
| Major change in health or behaviour of family member                                                                                                    | <input type="radio"/> | <input type="radio"/> |
| Taking on a mortgage or loan for a major purchase (e.g. home, business)                                                                                 | <input type="radio"/> | <input type="radio"/> |
| Taking on a loan for a lesser purchase (e.g. car, furniture)                                                                                            | <input type="radio"/> | <input type="radio"/> |
| Change in eating habits (e.g. a lot more or a lot less food intake, or very different meal hours or surroundings)                                       | <input type="radio"/> | <input type="radio"/> |
| Pregnancy either yourself or being the father                                                                                                           | <input type="radio"/> | <input type="radio"/> |
| Troubles with boss                                                                                                                                      | <input type="radio"/> | <input type="radio"/> |
| Change in financial state (e.g. a lot worse off or a lot better off than usual)                                                                         | <input type="radio"/> | <input type="radio"/> |
| Change to a different line of work                                                                                                                      | <input type="radio"/> | <input type="radio"/> |
| Marital reconciliation                                                                                                                                  | <input type="radio"/> | <input type="radio"/> |
| Change in number of arguments with spouse/life partner (e.g. either a lot more or a lot less than usual regarding child-rearing, personal habits, etc.) | <input type="radio"/> | <input type="radio"/> |
| Change in living conditions (e.g. building new home, remodelling, deterioration of neighbourhood or home)                                               | <input type="radio"/> | <input type="radio"/> |

### S3 Appendix 3

|                                                                                                 |                       |                       |
|-------------------------------------------------------------------------------------------------|-----------------------|-----------------------|
| Outstanding personal achievement                                                                | <input type="radio"/> | <input type="radio"/> |
| Retirement                                                                                      | <input type="radio"/> | <input type="radio"/> |
| Business readjustment (e.g. merger, reorganisation, bankruptcy)                                 | <input type="radio"/> | <input type="radio"/> |
| Spouse/life partner begins or stops work                                                        | <input type="radio"/> | <input type="radio"/> |
| Change in residence                                                                             | <input type="radio"/> | <input type="radio"/> |
| Change in sleeping habits (e.g. a lot more or a lot less, or change in part of day when asleep) | <input type="radio"/> | <input type="radio"/> |
| Gain of new family member (e.g. through birth, adoption, grandparent moving in)                 | <input type="radio"/> | <input type="radio"/> |
| Change in work hours or conditions                                                              | <input type="radio"/> | <input type="radio"/> |
| Son or daughter leaving home (e.g. attend college, marriage)                                    | <input type="radio"/> | <input type="radio"/> |
| Change in responsibilities at work (e.g. promotion, demotion, lateral transfer)                 | <input type="radio"/> | <input type="radio"/> |
| Change in social activities (e.g. clubs, dancing, movies, visiting)                             | <input type="radio"/> | <input type="radio"/> |
| Divorce                                                                                         | <input type="radio"/> | <input type="radio"/> |
| Personal injury or illness                                                                      | <input type="radio"/> | <input type="radio"/> |
| Death of close family member                                                                    | <input type="radio"/> | <input type="radio"/> |
| Change in recreation type/amount                                                                | <input type="radio"/> | <input type="radio"/> |
| Death of spouse/life partner                                                                    | <input type="radio"/> | <input type="radio"/> |
| Change in number of family get-togethers (e.g. a lot more or a lot less than usual)             | <input type="radio"/> | <input type="radio"/> |
| Detention in jail or other institution                                                          | <input type="radio"/> | <input type="radio"/> |
| Marital separation                                                                              | <input type="radio"/> | <input type="radio"/> |
| Vacation                                                                                        | <input type="radio"/> | <input type="radio"/> |

### S3 Appendix 3

|                                                            |                       |                       |
|------------------------------------------------------------|-----------------------|-----------------------|
| Foreclosure/repossession on mortgage or loan               | <input type="radio"/> | <input type="radio"/> |
| Death of close friend                                      | <input type="radio"/> | <input type="radio"/> |
| Changing to a new school                                   | <input type="radio"/> | <input type="radio"/> |
| Begin or end formal schooling                              | <input type="radio"/> | <input type="radio"/> |
| Christmas                                                  | <input type="radio"/> | <input type="radio"/> |
| Minor violations of the law (e.g. traffic/parking tickets) | <input type="radio"/> | <input type="radio"/> |
| Single person, living alone                                | <input type="radio"/> | <input type="radio"/> |

---

### S3 Appendix 3

#### Changed items:

| Original item rank | Original Item wording                     | New item wording                                                                                                                                        |
|--------------------|-------------------------------------------|---------------------------------------------------------------------------------------------------------------------------------------------------------|
| 1                  | Death of spouse                           | Death of spouse/life partner                                                                                                                            |
| 4                  | Jail term                                 | Detention in jail or other institution                                                                                                                  |
| 8                  | Fired at work                             | Losing your job (e.g. redundancy, dismissal, etc.)                                                                                                      |
| 11                 | Change in health of family member         | Major change in health or behaviour of family member                                                                                                    |
| 12                 | Pregnancy                                 | Pregnancy either yourself or being the father                                                                                                           |
| 13                 | Sex difficulties                          | Sexual difficulties                                                                                                                                     |
| 14                 | Gain of new family member                 | Gain of new family member (e.g. through birth, adoption, grandparent moving in)                                                                         |
| 15                 | Business readjustment                     | Business readjustment (e.g. merger, reorganisation, bankruptcy)                                                                                         |
| 16                 | Change in financial state                 | Change in financial state (e.g. a lot worse off or a lot better off than usual)                                                                         |
| 19                 | Change in number of arguments with spouse | Change in number of arguments with spouse/life partner (e.g. either a lot more or a lot less than usual regarding child-rearing, personal habits, etc.) |
| 20                 | Mortgage over \$10,000                    | Taking on a mortgage or loan for a major purchase (e.g. home, business)                                                                                 |
| 21                 | Foreclosure of mortgage or loan           | Foreclosure/repossession on mortgage or loan                                                                                                            |
| 22                 | Change in responsibilities at work        | Change in responsibilities at work (e.g. promotion, demotion, lateral transfer)                                                                         |
| 23                 | Son or daughter leaving home              | Son or daughter leaving home (e.g. attend college, marriage)                                                                                            |
| 26                 | Wife begin or stop work                   | Spouse/life partner begins or stops work                                                                                                                |
| 27                 | Begin or end schooling                    | Begin or end formal schooling                                                                                                                           |
| 28                 | Change in living conditions               | Change in living conditions (e.g. building new home, remodelling, deterioration of neighbourhood or home)                                               |
| 29                 | Revision of personal habits               | Revision of personal habits (e.g. dress, manners, associations)                                                                                         |
| 33                 | Change in schools                         | Changing to a new school                                                                                                                                |
| 34                 | Change in recreation                      | Change in recreation type/amount                                                                                                                        |
| 35                 | Change in church activities               | Change in religious activities (e.g. a lot more or a lot less than usual)                                                                               |
| 36                 | Change in social activities               | Change in social activities (e.g. clubs, dancing, movies, visiting)                                                                                     |
| 37                 | Mortgage of loan less than \$10,000       | Taking on a loan for a lesser purchase (e.g. car, furniture)                                                                                            |
| 38                 | Change in sleeping habits                 | Change in sleeping habits (e.g. a lot more or a lot less, or change in part of day when asleep)                                                         |
| 39                 | Change in number of family get-togethers  | Change in number of family get-togethers (e.g. a lot more or a lot less than usual)                                                                     |
| 40                 | Change in eating habits                   | Change in eating habits (e.g. a lot more or a lot less food intake, or very different meal hours or surroundings)                                       |
| 43                 | Minor violations of the law               | Minor violations of the law (e.g. traffic/parking tickets)                                                                                              |
