# Supplementary material for: The social readjustment rating scale: Updated and modernised
Source: PubMed Central journal article supplement (PMC10727443; doi:10.1371/journal.pone.0295943), 2023-12-18
Supplement: pone.0295943.s006.pdf [file pone.0295943.s006.pdf]

## S5 Appendix 5

### Loneliness questionnaire

ONS Website contents *verbatim* (Robards, 2022):

“Specifically, we recommend four questions to capture different aspects of loneliness. The first three questions are from the University of California, Los Angeles (UCLA) (Russell, 1996) three-item loneliness scale (Hughes, Waite, Hawkey, & Cacioppo, 2004). The wording of the UCLA questions and response options are taken from the [English Longitudinal Study of Ageing](#) (Lee et al., 2021). The last is a direct question about how often the respondent feels lonely, currently used on the [Community Life Survey](#). For those aged 16 years and over, the loneliness measures should be as in Table 1.”

**Table 1: Recommended measures of loneliness for adults**

| Measures                                    | Items                                                 | Response categories                                              |
|---------------------------------------------|-------------------------------------------------------|------------------------------------------------------------------|
| <b>The three-item UCLA Loneliness scale</b> | 1. How often do you feel that you lack companionship? | Hardly ever or never, Some of the time, Often                    |
|                                             | 2. How often do you feel left out?                    | Hardly ever or never, Some of the time, Often                    |
|                                             | 3. How often do you feel isolated from others?        | Hardly ever or never, Some of the time, Often                    |
| <b>The direct measure of loneliness</b>     | How often do you feel lonely?                         | Often/always, Some of the time, Occasionally, Hardly ever, Never |

Source: Office for National Statistics (Robards, 2022)

[\[https://www.ons.gov.uk/peoplepopulationandcommunity/wellbeing/methodologies/measuringlonelinessguidanceforuseofthenationalindicatorsonsurveys\]](https://www.ons.gov.uk/peoplepopulationandcommunity/wellbeing/methodologies/measuringlonelinessguidanceforuseofthenationalindicatorsonsurveys)

#### R-UCLA Scoring:

Items 1 – 3: Hardly ever or never = 1, Some of the time = 2, Often = 3

A higher score indicates a greater degree of loneliness.

## S5 Appendix 5

### REFERENCES:

- Hughes, M. E., Waite, L. J., Hawkey, L. C., & Cacioppo, J. T. (2004). A Short Scale for Measuring Loneliness in Large Surveys: Results From Two Population-Based Studies. *Res Aging, 26*(6), 655-672. doi:10.1177/0164027504268574
- Lee, S. L., Pearce, E., Ajnakina, O., Johnson, S., Lewis, G., Mann, F., . . . Lewis, G. (2021). The association between loneliness and depressive symptoms among adults aged 50 years and older: a 12-year population-based cohort study. *Lancet Psychiatry, 8*(1), 48-57. doi:10.1016/s2215-0366(20)30383-7
- Robards, J. (2022). *Principal projection for the UK - population by five-year age groups and sex*. ONS website: Office for National Statistics Retrieved from <https://www.ons.gov.uk/peoplepopulationandcommunity/wellbeing/methodologies/measuringlonelinessguidanceforuseofthenationalindicatorsonsurveys>
- Russell, D. W. (1996). UCLA Loneliness Scale (Version 3): reliability, validity, and factor structure. *J Pers Assess, 66*(1), 20-40. doi:10.1207/s15327752jpa6601\_2
