# Supplementary material for: The social readjustment rating scale: Updated and modernised
Source: PubMed Central journal article supplement (PMC10727443; doi:10.1371/journal.pone.0295943), 2023-12-18
Supplement: pone.0295943.s007.pdf [file pone.0295943.s007.pdf]

## S6 Appendix 6

**Table. Robustness Checks for all Mann-Whitney U Bayesian Analyses**

| Variable of interest                        | Comparison                                          | Cauchy value                          |                            |                                    | N   |
|---------------------------------------------|-----------------------------------------------------|---------------------------------------|----------------------------|------------------------------------|-----|
|                                             |                                                     | userPrior<br>(medium)<br><b>0.707</b> | wide prior<br><b>1.000</b> | ultrawide<br>prior<br><b>1.414</b> |     |
|                                             | overall SRRS weights original sample vs. new sample | 6.22                                  | 5.08                       | 3.64                               | 86  |
|                                             | Wording change weight difference (new - original)   | 0.35                                  | 0.29                       | 0.21                               | 43  |
|                                             | Normative sample vs. 'old-older' adults             | 0.24                                  | 0.17                       | 0.12                               | 86  |
| age group                                   | YA vs. MA                                           | 0.23                                  | 0.16                       | 0.12                               | 86  |
|                                             | YA vs. OA                                           | 0.22                                  | 0.16                       | 0.12                               | 86  |
|                                             | MA vs. OA                                           | 0.23                                  | 0.16                       | 0.12                               | 86  |
| sex                                         | Males vs. Females                                   | 1.42                                  | 1.22                       | 0.90                               | 86  |
| age group (YA vs. MA)                       | family                                              | 0.21                                  | 0.11                       | 0.08                               | 407 |
|                                             | financial                                           | 0.26                                  | 0.14                       | 0.10                               | 407 |
|                                             | personal                                            | 0.13                                  | 0.09                       | 0.06                               | 407 |
|                                             | work                                                | 0.13                                  | 0.09                       | 0.06                               | 407 |
| age group (YA vs. OA)                       | family                                              | 0.16                                  | 0.11                       | 0.08                               | 249 |
|                                             | financial                                           | 0.14                                  | 0.10                       | 0.07                               | 249 |
|                                             | personal                                            | 0.15                                  | 0.11                       | 0.08                               | 249 |
|                                             | work                                                | 0.14                                  | 0.11                       | 0.08                               | 249 |
| age group (MA vs. OA)                       | family                                              | 0.11                                  | 0.08                       | 0.06                               | 424 |
|                                             | financial                                           | 0.19                                  | 0.16                       | 0.11                               | 424 |
|                                             | personal                                            | 0.12                                  | 0.08                       | 0.06                               | 424 |
|                                             | work                                                | 0.11                                  | 0.08                       | 0.06                               | 424 |
| sex (m vs. f)                               | family                                              | 73382.37                              | 57806.85                   | 3206.45                            | 538 |
|                                             | financial                                           | 27.22                                 | 30.46                      | 18.36                              | 538 |
|                                             | personal                                            | 4039.19                               | 3507.24                    | 3606.85                            | 538 |
|                                             | work                                                | 367.71                                | 2189.98                    | 3213.54                            | 538 |
| ethnicity (white vs. non-white)             | family                                              | 0.13                                  | 0.08                       | 0.06                               | 540 |
|                                             | financial                                           | 0.20                                  | 0.08                       | 0.06                               | 540 |
|                                             | personal                                            | 0.13                                  | 0.08                       | 0.06                               | 540 |
|                                             | work                                                | 0.12                                  | 0.07                       | 0.05                               | 540 |
| religion (no religion vs. religion)         | family                                              | 0.24                                  | 0.16                       | 0.12                               | 540 |
|                                             | financial                                           | 0.27                                  | 0.19                       | 0.15                               | 540 |
|                                             | personal                                            | 0.59                                  | 0.51                       | 0.38                               | 540 |
|                                             | work                                                | 0.28                                  | 0.22                       | 0.16                               | 540 |
| relationship status (married vs. unmarried) | family                                              | 1.74                                  | 1.61                       | 1.14                               | 540 |
|                                             | financial                                           | 0.11                                  | 0.08                       | 0.06                               | 540 |
|                                             | personal                                            | 0.16                                  | 0.15                       | 0.11                               | 540 |
|                                             | work                                                | 0.13                                  | 0.12                       | 0.09                               | 540 |
| employment status (employed vs. unemployed) | family                                              | 0.20                                  | 0.12                       | 0.09                               | 540 |
|                                             | financial                                           | 0.11                                  | 0.08                       | 0.06                               | 540 |
|                                             | personal                                            | 0.10                                  | 0.07                       | 0.05                               | 540 |
|                                             | work                                                | 0.15                                  | 0.12                       | 0.09                               | 540 |
| single person, living alone                 | age group (YA vs. MA)                               | 0.17                                  | 0.11                       | 0.08                               | 407 |
|                                             | age group (YA vs. OA)                               | 0.43                                  | 0.34                       | 0.26                               | 249 |
|                                             | age group (MA vs. OA)                               | 0.16                                  | 0.10                       | 0.13                               | 424 |
|                                             | sex (males vs. females)                             | 0.52                                  | 0.34                       | 0.25                               | 538 |
|                                             | ethnicity (white vs. non-white)                     | 0.14                                  | 0.10                       | 0.07                               | 540 |
|                                             | religion (religion vs. no religion)                 | 1.68                                  | 0.99                       | 0.71                               | 540 |
|                                             | relationship status (married vs. not married)       | 1.89                                  | 1.39                       | 1.01                               | 540 |
|                                             | employment status (employed vs. unemployed)         | 0.12                                  | 0.09                       | 0.06                               | 540 |

This table provides sensitivity analyses for all between-subjects comparisons and the respective sample size used in each case. Sensitivity analyses were performed by adjusting the the Cauchy distribution which changes the likelihood of capturing evidence of an effect.
