# Supplementary material for: The social readjustment rating scale: Updated and modernised
Source: PubMed Central journal article supplement (PMC10727443; doi:10.1371/journal.pone.0295943), 2023-12-18
Supplement: pone.0295943.s009.pdf [file pone.0295943.s009.pdf]

## S8 Appendix 8

**Table. Descriptive statistics for SRRS events by unabridged sub-group demographics, categorised as family, financial, personal or work items.**

|                     |                                               | Mean SRRS weights  |                    |                      |                    |
|---------------------|-----------------------------------------------|--------------------|--------------------|----------------------|--------------------|
|                     |                                               | family items       | financial items    | personal items items | work items         |
| Age                 | sub-groups                                    | Median (IQR)       | Median (IQR)       | Median (IQR)         | Median (IQR)       |
|                     | < 30 years                                    | 53.6 (44.8 - 61)   | 50 (33.8 - 55.8)   | 35.5 (28.6 - 45.3)   | 42.1 (31.6 - 54.3) |
|                     | 30 to 60 years                                | 54.6 (45.7 - 64.3) | 45 (35 - 52.5)     | 34.7 (28.9 - 43.3)   | 43.6 (32.1 - 52.9) |
|                     | > 60 years                                    | 53.9 (46.1 - 61.1) | 46.5 (35.6 - 58.8) | 33.4 (26.4 - 46.6)   | 42.9 (33.2 - 54.7) |
| Sex                 | female                                        | 57.1 (48.9 - 64.9) | 47.5 (37.5 - 56.2) | 36.9 (30.6 - 46.5)   | 45.7 (35.7 - 55.7) |
|                     | male                                          | 50.4 (42.4 - 58.8) | 42.5 (30 - 55)     | 32.3 (24.7 - 40.5)   | 40 (29.3 - 50)     |
| ethnicity           | white                                         | 54.3 (46.4 - 61.8) | 46.3 (35 - 55)     | 34.2 (27.9 - 43.7)   | 42.9 (32.9 - 52.9) |
|                     | mixed race                                    | 50.4 (39.8 - 59.6) | 41.3 (33.8 - 60)   | 38.2 (30.8 - 44.5)   | 43.9 (30.7 - 50)   |
|                     | asian (southern/southeastern asia)            | 50.7 (37 - 60.6)   | 42.5 (23 - 58.4)   | 30.6 (19 - 44.8)     | 43.6 (23.5 - 54.3) |
|                     | chinese (east asian)                          | 58.6 (55.4 - 67.1) | 50 (35 - 52.5)     | 35.3 (32.1 - 44.5)   | 48.6 (35.7 - 57.1) |
|                     | black (any region)                            | 60.4 (46.8 - 67.9) | 52.5 (42.5 - 65)   | 44.7 (32.6 - 49.8)   | 51.4 (40 - 60.1)   |
| religion            | no religion                                   | 53.6 (45.6 - 60.7) | 45 (35 - 54.1)     | 33.9 (28 - 41.1)     | 42.1 (32.1 - 52.1) |
|                     | Christian                                     | 63 (43.7 - 73.3)   | 52.5 (26.9 - 77.2) | 43.7 (27.1 - 48.2)   | 47.1 (32 - 53.2)   |
|                     | Buddhist                                      | 55.7 (46.4 - 64.4) | 47.5 (35 - 57.5)   | 36.1 (28.3 - 47.1)   | 44.3 (34.3 - 55.3) |
|                     | Hindu                                         | 49.6 (31.8 - 59.1) | 58.8 (27.5 - 83.1) | 32.8 (19.6 - 47.2)   | 45.7 (25.4 - 60.1) |
|                     | Jewish                                        | 48.7 (36.2 - 56.9) | 38.1 (30.6 - 42.5) | 28.1 (20.9 - 36.4)   | 37.5 (28.1 - 45.7) |
|                     | Muslim                                        | 50.4 (31.5 - 62.2) | 42.5 (20.3 - 55)   | 33.7 (16.6 - 45.5)   | 32.9 (18.8 - 45.4) |
|                     | Sikh                                          | 51.8 (44.9 - 72)   | 58.8 (36.9 - 66.3) | 28.7 (25.1 - 62.2)   | 53.6 (32.9 - 75.7) |
|                     | any other religion                            | 55 (46.4 - .)      | 52.5 (42.5 - .)    | 31.6 (26.9 - .)      | 48.6 (35.7 - .)    |
| relationship status | divorced                                      | 55 (45.9 - 58.9)   | 47.5 (35.6 - 56.3) | 33.9 (31 - 41.7)     | 47.9 (34.3 - 52.5) |
|                     | in a relationship                             | 50.5 (43.1 - 57.1) | 41.3 (32.8 - 51.8) | 34.3 (25.9 - 40.7)   | 38.2 (28.4 - 47)   |
|                     | married/LTR                                   | 55 (46.8 - 64.5)   | 46.5 (35 - 55)     | 34.7 (28.4 - 45.3)   | 42.9 (32.9 - 54.3) |
|                     | separated                                     | 40.8 (16.9 - 54.4) | 65 (10.6 - 69.8)   | 28 (17.4 - 40.3)     | 31.4 (14.3 - 51.4) |
|                     | single                                        | 54.3 (44.3 - 61.8) | 46.3 (34.4 - 55.6) | 35.8 (27.1 - 44.7)   | 44.3 (32.9 - 53.9) |
|                     | widowed/LP died                               | 50.4 (45 - 58.8)   | 46.3 (35.3 - 59.7) | 29.9 (28.2 - 48.8)   | 44.6 (29.5 - 52.5) |
| employment status   | currently unemployed, looking for work        | 53.9 (43.9 - 63.5) | 49.4 (41.3 - 56.9) | 31.4 (26.2 - 38.2)   | 42.1 (31.4 - 54.1) |
|                     | full-time or part-time employed               | 54.3 (46.1 - 63)   | 46 (35 - 55)       | 34.7 (28.2 - 44.5)   | 42.9 (32.9 - 55)   |
|                     | long-term sick or disabled                    | 61.1 (57.9 - 67.4) | 52.5 (47.5 - 65)   | 41.6 (36.9 - 49.5)   | 49.3 (45.7 - 61.4) |
|                     | looking after home or family                  | 58.3 (50.8 - 64.4) | 47.5 (37.8 - 52.5) | 36.1 (32.1 - 42.9)   | 43.6 (32.3 - 50.5) |
|                     | other*                                        | 47.1 (40 - 55.7)   | 35 (28.1 - 50.6)   | 34.5 (22.1 - 38.7)   | 32.9 (27.9 - 54.6) |
|                     | retired                                       | 51.6 (44.1 - 59.3) | 45 (33.8 - 58.1)   | 32.2 (25.3 - 46.1)   | 41.4 (29.6 - 52.4) |
|                     | student (p/t or f/t) and currently unemployed | 51.1 (44.7 - 60.4) | 48.8 (33.8 - 57.5) | 37.4 (31.3 - 47.6)   | 44.3 (35 - 54.3)   |

\*other combines 'have never worked' (n=2) and the entry where 1 person gave no specific details.
